# Supplementary material for: Concomitant Use of Dietary Supplements and Medicines Among Preschool and School-Aged Children in Japan
Source: PubMed Central journal article supplement (PMC6950417; doi:10.3390/nu11122960), 2019-12-04
Supplement: nutrients-11-02960-s001.pdf [file nutrients-11-02960-s001.pdf]

## Supplementary tables

**Table S-1.** Types of dietary supplements concomitantly used with rhinitis medicines. (%)

|                                          | Boys (n=282) |                |                |                 |                 |          |         | Girls (n=180) |               |                |                 |                 |          |         |
|------------------------------------------|--------------|----------------|----------------|-----------------|-----------------|----------|---------|---------------|---------------|----------------|-----------------|-----------------|----------|---------|
|                                          | N            | 1-3 years (22) | 4-6 years (31) | ES 1st-3rd (50) | ES 4th-6th (68) | JHS (61) | HS (50) | N             | 1-3 years (7) | 4-6 years (22) | ES 1st-3rd (30) | ES 4th-6th (36) | JHS (46) | HS (39) |
| Vitamin/Mineral                          | 76           | 27.3           | 19.4           | 28.0            | 19.1            | 24.6     | 44.0    | 70            | 57.1          | 18.2           | 26.7            | 44.4            | 43.5     | 46.2    |
| Probiotics                               | 65           | 22.7           | 45.2           | 18.0            | 26.5            | 19.7     | 14.0    | 44            | -             | 36.4           | 30.0            | 25.0            | 28.3     | 12.8    |
| Growth-promoting                         | 47           | 9.1            | 12.9           | 16.0            | 19.1            | 21.3     | 14.0    | 8             | -             | 9.1            | 13.3            | 5.6             | -        | -       |
| Protein/amino acid                       | 15           | -              | -              | -               | 5.9             | 9.8      | 10.0    | 2             | -             | 4.5            | -               | 2.8             | -        | -       |
| Academic enhancement                     | 8            | -              | 3.2            | 2.0             | 2.9             | 6.6      | -       | 6             | -             | 9.1            | 6.7             | 2.8             | 2.2      | -       |
| Skin repairing                           | 3            | -              | -              | -               | -               | 3.3      | 2.0     | 3             | -             | -              | -               | -               | 2.2      | 5.1     |
| Weight loss                              | 0            | -              | -              | -               | -               | -        | -       | 1             | -             | -              | -               | -               | 2.2      | -       |
| Botanical nutrients/ Aojiru <sup>1</sup> | 18           | 4.5            | -              | 6.0             | 10.3            | 8.2      | 4.0     | 12            | 28.6          | 4.5            | -               | 8.3             | 6.5      | 7.7     |
| n-3 PUFA                                 | 17           | 9.1            | 3.2            | 8.0             | 7.4             | 3.3      | 6.0     | 10            | -             | -              | 6.7             | 8.3             | -        | 12.8    |
| Cod liver oil                            | 10           | 9.1            | 3.2            | 6.0             | 5.9             | -        | -       | 7             | 14.3          | 18.2           | 3.3             | 2.8             | -        | -       |
| Eye care <sup>2</sup>                    | 8            | -              | -              | 2.0             | 1.5             | 3.3      | 8.0     | 6             | -             | -              | -               | 2.8             | 8.7      | 2.6     |

<sup>1</sup>A powdered drink mix made from green leafy vegetables such as young leaves of *Angelica keiskei* (Miq.) Koidz and Barley, and *Brassica oleracea* L. var. *acephala* DC. <sup>2</sup>Products containing anthocyanin, lutein, and zeaxanthin. Note: Multiple answers.

**Table S-2.** Types of dietary supplements concomitantly used with eczema medicines. (%)

|                                          | Boys (n=257) |                      |                      |                       |                       |             |            | Girls (n=158) |                     |                      |                       |                       |             |            |
|------------------------------------------|--------------|----------------------|----------------------|-----------------------|-----------------------|-------------|------------|---------------|---------------------|----------------------|-----------------------|-----------------------|-------------|------------|
|                                          | N            | 1-3<br>years<br>(20) | 4-6<br>years<br>(28) | ES<br>1st-3rd<br>(47) | ES<br>4th-6th<br>(65) | JHS<br>(50) | HS<br>(47) | N             | 1-3<br>years<br>(8) | 4-6<br>years<br>(19) | ES<br>1st-3rd<br>(31) | ES<br>4th-6th<br>(30) | JHS<br>(38) | HS<br>(32) |
| Vitamin/Mineral                          | 72           | 35.0                 | 21.4                 | 27.7                  | 21.5                  | 24.0        | 42.6       | 62            | 62.5                | 15.8                 | 35.5                  | 43.3                  | 42.1        | 43.8       |
| Probiotics                               | 55           | 20.0                 | 39.3                 | 17.0                  | 24.6                  | 18.0        | 14.9       | 37            | -                   | 36.8                 | 29.0                  | 26.7                  | 26.3        | 9.4        |
| Growth-promoting                         | 44           | 5.0                  | 14.3                 | 19.1                  | 20.0                  | 20.0        | 14.9       | 6             | -                   | 10.5                 | 9.7                   | 3.3                   | -           | -          |
| Protein/amino acid                       | 13           | -                    | -                    | -                     | 6.2                   | 10.0        | 8.5        | 1             | -                   | -                    | -                     | 3.3                   | -           | -          |
| Academic enhancement                     | 7            | -                    | 3.6                  | 2.1                   | 3.1                   | 6.0         | -          | 5             | -                   | 5.3                  | 6.5                   | 3.3                   | 2.6         | -          |
| Skin repairing                           | 3            | -                    | -                    | -                     | -                     | 4.0         | 2.1        | 3             | -                   | -                    | -                     | -                     | 2.6         | 6.3        |
| Weight loss                              | 0            | -                    | -                    | -                     | -                     | -           | -          | 1             | -                   | -                    | -                     | -                     | 2.6         | -          |
| Botanical nutrients/ Aojiru <sup>1</sup> | 16           | 5.0                  | -                    | 4.3                   | 9.2                   | 10.0        | 4.3        | 10            | 25.0                | 5.3                  | -                     | 10.0                  | 5.3         | 6.3        |
| n-3 PUFA                                 | 14           | 10.0                 | 3.6                  | 6.4                   | 6.2                   | 2.0         | 6.4        | 8             | -                   | -                    | 6.5                   | 6.7                   | -           | 12.5       |
| Cod liver oil                            | 10           | 10.0                 | 3.6                  | 6.4                   | 6.2                   | -           | -          | 5             | 12.5                | 10.5                 | 3.2                   | 3.3                   | -           | -          |
| Eye care <sup>2</sup>                    | 6            | -                    | -                    | 2.1                   | 1.5                   | -           | 8.5        | 4             | -                   | -                    | -                     | -                     | 7.9         | 3.1        |

<sup>1</sup>A powdered drink mix made from green leafy vegetables such as young leaves of *Angelica keiskei* (Miq.) Koidz and Barley, and *Brassica oleracea* L. var. *acephala* DC. <sup>2</sup>Products containing anthocyanin, lutein, and zeaxanthin. Note: Multiple answers.

**Table S-3.** Types of dietary supplements concomitantly used with asthma medicines. (%)

|                                          | Boys (n=226) |                      |                      |                       |                       |             |            | Girls (n=141) |                      |                      |                       |                       |             |            |
|------------------------------------------|--------------|----------------------|----------------------|-----------------------|-----------------------|-------------|------------|---------------|----------------------|----------------------|-----------------------|-----------------------|-------------|------------|
|                                          | N            | 1-3<br>years<br>(27) | 4-6<br>years<br>(39) | ES<br>1st-3rd<br>(45) | ES<br>4th-6th<br>(49) | JHS<br>(35) | HS<br>(31) | N             | 1-3<br>years<br>(12) | 4-6<br>years<br>(32) | ES<br>1st-3rd<br>(25) | ES<br>4th-6th<br>(21) | JHS<br>(35) | HS<br>(16) |
| Vitamin/Mineral                          | 62           | 29.6                 | 23.1                 | 26.7                  | 18.4                  | 25.7        | 48.4       | 51            | 41.7                 | 15.6                 | 40.0                  | 28.6                  | 48.6        | 50.0       |
| Probiotics                               | 53           | 11.1                 | 41.0                 | 26.7                  | 28.6                  | 17.1        | 6.5        | 33            | 16.7                 | 31.3                 | 32.0                  | 33.3                  | 17.1        | -          |
| Growth-promoting                         | 35           | 7.4                  | 7.7                  | 15.6                  | 20.4                  | 25.7        | 12.9       | 10            | -                    | 9.4                  | 16.0                  | 4.8                   | 5.7         | -          |
| Protein/amino acid                       | 13           | 3.7                  | -                    | 2.2                   | 8.2                   | 11.4        | 9.7        | 7             | 8.3                  | 3.1                  | 12.0                  | 9.5                   | -           | -          |
| Academic enhancement                     | 10           | 7.4                  | 7.7                  | 2.2                   | 4.1                   | 5.7         | -          | 7             | -                    | 6.3                  | 12.0                  | 4.8                   | 2.9         | -          |
| Skin repairing                           | 2            | -                    | -                    | 2.2                   | -                     | -           | 3.2        | 2             | -                    | -                    | -                     | -                     | 2.9         | 6.3        |
| Weight loss                              | 0            | -                    | -                    | -                     | -                     | -           | -          | 0             | -                    | -                    | -                     | -                     | -           | -          |
| Botanical nutrients/ Aojiru <sup>1</sup> | 12           | 7.4                  | -                    | 6.7                   | 6.1                   | 11.4        | -          | 4             | 8.3                  | 3.1                  | -                     | -                     | 2.9         | 6.3        |
| n-3 PUFA                                 | 11           | 3.7                  | 2.6                  | 6.7                   | 8.2                   | -           | 6.5        | 4             | -                    | 3.1                  | 4.0                   | 4.8                   | -           | 6.3        |
| Cod liver oil                            | 12           | 11.1                 | 7.7                  | 4.4                   | 6.1                   | 2.9         | -          | 13            | 8.3                  | 21.9                 | 12.0                  | 4.8                   | 2.9         | -          |
| Eye care <sup>2</sup>                    | 3            | -                    | -                    | 4.4                   | 2.0                   | -           | -          | 5             | -                    | -                    | -                     | 4.8                   | 8.6         | 6.3        |

<sup>1</sup>A powdered drink mix made from green leafy vegetables such as young leaves of *Angelica keiskei* (Miq.) Koidz and Barley, and *Brassica oleracea* L. var. *acephala* DC. <sup>2</sup>Products containing anthocyanin, lutein, and zeaxanthin. Note: Multiple answers.

**Table S-4.** Types of dietary supplements concomitantly used with gastrointestinal diseases medicines. (%)

|                                          | Boys (n=58) |                      |                      |                      |                      |             |            | Girls (n=52) |                     |                     |                       |                      |             |            |
|------------------------------------------|-------------|----------------------|----------------------|----------------------|----------------------|-------------|------------|--------------|---------------------|---------------------|-----------------------|----------------------|-------------|------------|
|                                          | N           | 1-3<br>years<br>(12) | 4-6<br>years<br>(10) | ES<br>1st-3rd<br>(6) | ES<br>4th-6th<br>(9) | JHS<br>(10) | HS<br>(11) | N            | 1-3<br>years<br>(5) | 4-6<br>years<br>(6) | ES<br>1st-3rd<br>(11) | ES<br>4th-6th<br>(6) | JHS<br>(10) | HS<br>(14) |
| Vitamin/Mineral                          | 22          | 50.0                 | 30.0                 | 50.0                 | 11.1                 | 50.0        | 36.4       | 20           | 20.0                | 16.7                | 36.4                  | 16.7                 | 50.0        | 57.1       |
| Probiotics                               | 11          | 16.7                 | 30.0                 | 16.7                 | 33.3                 | 20.0        | -          | 5            | 40.0                | 16.7                | 9.1                   | -                    | 10.0        | -          |
| Growth-promoting                         | 3           | -                    | -                    | -                    | -                    | 30.0        | -          | 1            | -                   | -                   | -                     | 16.7                 | -           | -          |
| Protein/amino acid                       | 4           | -                    | -                    | -                    | 11.1                 | -           | 27.3       | 1            | -                   | -                   | 9.1                   | -                    | -           | -          |
| Academic enhancement                     | 0           | -                    | -                    | -                    | -                    | -           | -          | 0            | -                   | -                   | -                     | -                    | -           | -          |
| Skin repairing                           | 0           | -                    | -                    | -                    | -                    | -           | -          | 0            | -                   | -                   | -                     | -                    | -           | -          |
| Weight loss                              | 0           | -                    | -                    | -                    | -                    | -           | -          | 0            | -                   | -                   | -                     | -                    | -           | -          |
| Botanical nutrients/ Aojiru <sup>1</sup> | 3           | -                    | -                    | -                    | 22.2                 | 10.0        | -          | 4            | -                   | 16.7                | 18.2                  | -                    | 10.0        | -          |
| n-3 PUFA                                 | 3           | 16.7                 | -                    | -                    | 11.1                 | -           | -          | 4            | 20.0                | 16.7                | -                     | -                    | -           | 14.3       |
| Cod liver oil                            | 2           | -                    | -                    | -                    | 11.1                 | 10.0        | -          | 1            | -                   | -                   | -                     | -                    | 10.0        | -          |
| Eye care <sup>2</sup>                    | 1           | -                    | -                    | -                    | -                    | 10.0        | -          | 3            | -                   | -                   | -                     | -                    | 20.0        | 7.1        |

<sup>1</sup>A powdered drink mix made from green leafy vegetables such as young leaves of *Angelica keiskei* (Miq.) Koidz and Barley, and *Brassica oleracea* L. var. *acephala* DC. <sup>2</sup>Products containing anthocyanin, lutein, and zeaxanthin. Note: Multiple answers.

**Table S-5.** Types of dietary supplements concomitantly used with psychiatric disorder medicines. (%)

|                                          | Boys (n=58) |               |               |                 |                 |          |         | Girls (n=52) |               |               |                |                |          |         |
|------------------------------------------|-------------|---------------|---------------|-----------------|-----------------|----------|---------|--------------|---------------|---------------|----------------|----------------|----------|---------|
|                                          | N           | 1-3 years (0) | 4-6 years (1) | ES 1st-3rd (15) | ES 4th-6th (22) | JHS (13) | HS (10) | N            | 1-3 years (1) | 4-6 years (2) | ES 1st-3rd (8) | ES 4th-6th (5) | JHS (10) | HS (20) |
| Vitamin/Mineral                          | 19          | -             | -             | 53.3            | 22.7            | 23.1     | 30.0    | 20           | 100.0         | 50.0          | 12.5           | 40.0           | 40.0     | 55.0    |
| Probiotics                               | 6           | -             | 100.0         | 20.0            | -               | 15.4     | -       | 9            | -             | 50.0          | 50.0           | -              | 20.0     | 10.0    |
| Growth-promoting                         | 10          | -             | -             | 13.3            | 27.3            | 7.7      | 10.0    | 1            | -             | -             | -              | -              | 10.0     | -       |
| Protein/amino acid                       | 4           | -             | -             | -               | 13.6            | 7.7      | -       | 0            | -             | -             | -              | -              | -        | -       |
| Academic enhancement                     | 5           | -             | -             | 6.7             | 4.5             | 23.1     | -       | 0            | -             | -             | -              | -              | -        | -       |
| Skin repairing                           | 0           | -             | -             | -               | -               | -        | -       | 2            | -             | -             | -              | -              | -        | 10.0    |
| Weight loss                              | 0           | -             | -             | -               | -               | -        | -       | 0            | -             | -             | -              | -              | -        | -       |
| Botanical nutrients/ Aojiru <sup>1</sup> | 8           | -             | -             | 6.7             | 9.1             | 23.1     | 20.0    | 1            | -             | -             | -              | -              | 10.0     | -       |
| n-3 PUFA                                 | 8           | -             | -             | 13.3            | 13.6            | 23.1     | -       | 2            | -             | -             | -              | -              | -        | 10.0    |
| Cod liver oil                            | 0           | -             | -             | -               | -               | -        | -       | 0            | -             | -             | -              | -              | -        | -       |
| Eye care <sup>2</sup>                    | 2           | -             | -             | -               | -               | 15.4     | -       | 1            | -             | -             | 12.5           | -              | -        | -       |

<sup>1</sup>A powdered drink mix made from green leafy vegetables such as young leaves of *Angelica keiskei* (Miq.) Koidz and Barley, and *Brassica oleracea* L. var. *acephala* DC. <sup>2</sup>Products containing anthocyanin, lutein, and zeaxanthin. Note: Multiple answers.

**Table S-6.** Types of dietary supplements concomitantly used with antibiotics. (%)

|                                          | Boys (n=16) |                     |                     |                      |                      |            |           | Girls (n=18) |                     |                     |                      |                      |            |           |
|------------------------------------------|-------------|---------------------|---------------------|----------------------|----------------------|------------|-----------|--------------|---------------------|---------------------|----------------------|----------------------|------------|-----------|
|                                          | N           | 1-3<br>years<br>(1) | 4-6<br>years<br>(1) | ES<br>1st-3rd<br>(2) | ES<br>4th-6th<br>(2) | JHS<br>(3) | HS<br>(7) | N            | 1-3<br>years<br>(4) | 4-6<br>years<br>(3) | ES<br>1st-3rd<br>(3) | ES<br>4th-6th<br>(5) | JHS<br>(2) | HS<br>(1) |
| Vitamin/Mineral                          | 4           | -                   | -                   | 50.0                 | 50.0                 | 66.7       | -         | 3            | 25.0                | -                   | 33.3                 | 20.0                 | -          | -         |
| Probiotics                               | 2           | -                   | -                   | -                    | -                    | -          | 28.6      | 6            | 75.0                | 33.3                | -                    | 20.0                 | 50.0       | -         |
| Growth-promoting                         | 2           | -                   | -                   | -                    | -                    | 33.3       | 14.3      | 0            | -                   | -                   | -                    | -                    | -          | -         |
| Protein/amino acid                       | 2           | -                   | -                   | -                    | -                    | -          | 28.6      | 0            | -                   | -                   | -                    | -                    | -          | -         |
| Academic enhancement                     | 0           | -                   | -                   | -                    | -                    | -          | -         | 0            | -                   | -                   | -                    | -                    | -          | -         |
| Skin repairing                           | 0           | -                   | -                   | -                    | -                    | -          | -         | 0            | -                   | -                   | -                    | -                    | -          | -         |
| Weight loss                              | 0           | -                   | -                   | -                    | -                    | -          | -         | 0            | -                   | -                   | -                    | -                    | -          | -         |
| Botanical nutrients/ Aojiru <sup>1</sup> | 1           | -                   | -                   | -                    | 50.0                 | -          | -         | 1            | -                   | -                   | -                    | -                    | 50.0       | -         |
| n-3 PUFA                                 | 1           | -                   | -                   | -                    | -                    | -          | 14.3      | 0            | -                   | -                   | -                    | -                    | -          | -         |
| Cod liver oil                            | 0           | -                   | -                   | -                    | -                    | -          | -         | 3            | -                   | 33.3                | 66.7                 | -                    | -          | -         |
| Eye care <sup>2</sup>                    | 0           | -                   | -                   | -                    | -                    | -          | -         | 1            | -                   | -                   | -                    | 20.0                 | -          | -         |

<sup>1</sup>A powdered drink mix made from green leafy vegetables such as young leaves of *Angelica keiskei* (Miq.) Koidz and Barley, and *Brassica oleracea* L. var. *acephala* DC. <sup>2</sup>Products containing anthocyanin, lutein, and zeaxanthin. Note: Multiple answers.

**Table S-7.** Types of dietary supplements concomitantly used with pain killer. (%)

|                                          | Boys (n=11) |                     |                     |                      |                      |            |           | Girls (n=18) |                     |                     |                      |                      |            |           |
|------------------------------------------|-------------|---------------------|---------------------|----------------------|----------------------|------------|-----------|--------------|---------------------|---------------------|----------------------|----------------------|------------|-----------|
|                                          | N           | 1-3<br>years<br>(0) | 4-6<br>years<br>(1) | ES<br>1st-3rd<br>(2) | ES<br>4th-6th<br>(0) | JHS<br>(4) | HS<br>(4) | N            | 1-3<br>years<br>(2) | 4-6<br>years<br>(1) | ES<br>1st-3rd<br>(1) | ES<br>4th-6th<br>(1) | JHS<br>(4) | HS<br>(9) |
| Vitamin/Mineral                          | 4           | -                   | -                   | 50.0                 | -                    | 25.0       | 50.0      | 9            | 50.0                | 100.0               | 100.0                | -                    | 100.0      | 22.2      |
| Probiotics                               | 1           | -                   | 100.0               | -                    | -                    | -          | -         | 2            | 50.0                | -                   | -                    | 100.0                | -          | -         |
| Growth-promoting                         | 0           | -                   | -                   | -                    | -                    | -          | -         | 0            | -                   | -                   | -                    | -                    | -          | -         |
| Protein/amino acid                       | 3           | -                   | -                   | -                    | -                    | 25.0       | 50.0      | 1            | -                   | -                   | -                    | -                    | -          | 11.1      |
| Academic enhancement                     | 1           | -                   | -                   | -                    | -                    | 25.0       | -         | 1            | -                   | -                   | -                    | -                    | -          | 11.1      |
| Skin repairing                           | 1           | -                   | -                   | 50.0                 | -                    | -          | -         | 1            | -                   | -                   | -                    | -                    | -          | 11.1      |
| Weight loss                              | 0           | -                   | -                   | -                    | -                    | -          | -         | 0            | -                   | -                   | -                    | -                    | -          | -         |
| Botanical nutrients/ Aojiru <sup>1</sup> | 0           | -                   | -                   | -                    | -                    | -          | -         | 0            | -                   | -                   | -                    | -                    | -          | -         |
| n-3 PUFA                                 | 0           | -                   | -                   | -                    | -                    | -          | -         | 0            | -                   | -                   | -                    | -                    | -          | -         |
| Cod liver oil                            | 0           | -                   | -                   | -                    | -                    | -          | -         | 0            | -                   | -                   | -                    | -                    | -          | -         |
| Eye care <sup>2</sup>                    | 1           | -                   | -                   | -                    | -                    | 25.0       | -         | 0            | -                   | -                   | -                    | -                    | -          | -         |

<sup>1</sup>A powdered drink mix made from green leafy vegetables such as young leaves of *Angelica keiskei* (Miq.) Koidz and Barley, and *Brassica oleracea* L. var. *acephala* DC. <sup>2</sup>Products containing anthocyanin, lutein, and zeaxanthin. Note: Multiple answers.

**Table S-8.** Types of dietary supplements concomitantly used with vitamin/mineral medicines. (%)

|                                          | Boys (n=60) |                     |                     |                      |                      |             |            | Girls (n=71) |                     |                     |                      |                      |             |            |
|------------------------------------------|-------------|---------------------|---------------------|----------------------|----------------------|-------------|------------|--------------|---------------------|---------------------|----------------------|----------------------|-------------|------------|
|                                          | N           | 1-3<br>years<br>(1) | 4-6<br>years<br>(7) | ES<br>1st-3rd<br>(7) | ES<br>4th-6th<br>(8) | JHS<br>(16) | HS<br>(21) | N            | 1-3<br>years<br>(4) | 4-6<br>years<br>(5) | ES<br>1st-3rd<br>(8) | ES<br>4th-6th<br>(6) | JHS<br>(26) | HS<br>(22) |
| Vitamin/Mineral                          | 35          | -                   | 71.4                | 57.1                 | 75.0                 | 68.8        | 42.9       | 34           | 75.0                | 80.0                | 37.5                 | 50.0                 | 46.2        | 40.9       |
| Probiotics                               | 2           | -                   | -                   | 14.3                 | -                    | -           | 4.8        | 4            | -                   | -                   | 25.0                 | -                    | 7.7         | -          |
| Growth-promoting                         | 4           | -                   | -                   | 14.3                 | -                    | 6.3         | 9.5        | 3            | -                   | -                   | -                    | 16.7                 | -           | 9.1        |
| Protein/amino acid                       | 3           | -                   | -                   | -                    | 12.5                 | -           | 9.5        | 1            | -                   | -                   | -                    | -                    | 3.8         | -          |
| Academic enhancement                     | 1           | -                   | -                   | -                    | 12.5                 | -           | -          | 1            | -                   | -                   | -                    | -                    | 3.8         | -          |
| Skin repairing                           | 0           | -                   | -                   | -                    | -                    | -           | -          | 0            | -                   | -                   | -                    | -                    | -           | -          |
| Weight loss                              | 0           | -                   | -                   | -                    | -                    | -           | -          | 0            | -                   | -                   | -                    | -                    | -           | -          |
| Botanical nutrients/ Aojiru <sup>1</sup> | 1           | -                   | -                   | -                    | -                    | -           | 4.8        | 3            | -                   | -                   | -                    | -                    | 3.8         | 9.1        |
| n-3 PUFA                                 | 4           | -                   | -                   | -                    | 12.5                 | -           | 14.3       | 0            | -                   | -                   | -                    | -                    | -           | -          |
| Cod liver oil                            | 2           | -                   | 14.3                | -                    | -                    | 6.3         | -          | 2            | -                   | 20.0                | 12.5                 | -                    | -           | -          |
| Eye care <sup>2</sup>                    | 1           | -                   | -                   | -                    | 12.5                 | -           | -          | 4            | -                   | -                   | -                    | 16.7                 | 11.5        | -          |

<sup>1</sup>A powdered drink mix made from green leafy vegetables such as young leaves of *Angelica keiskei* (Miq.) Koidz and Barley, and *Brassica oleracea* L. var. *acephala* DC. <sup>2</sup>Products containing anthocyanin, lutein, and zeaxanthin. Note: Multiple answers.
